# Supplementary material for: Wolf Creek XVII Part 1: The future of cardiac arrest resuscitation
Source: PubMed Central journal article supplement — Resusc Plus. 2023 Nov 23;16:100504. doi: 10.1016/j.resplu.2023.100504 (PMC10709066; doi:10.1016/j.resplu.2023.100504), 2023-11-23
Supplement: mmc2.pdf [file mmc2.pdf]

The Max Harry

**Weil Institute**

FOR CRITICAL CARE RESEARCH & INNOVATION

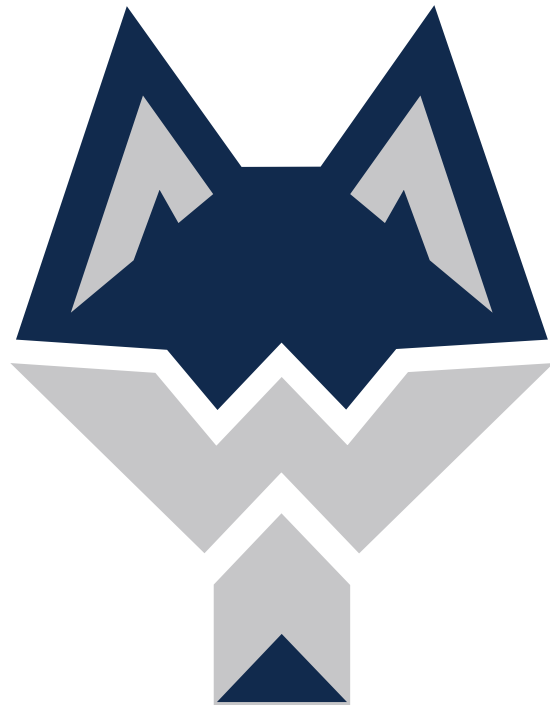

# WOLF CREEK

CONFERENCE PROGRAM

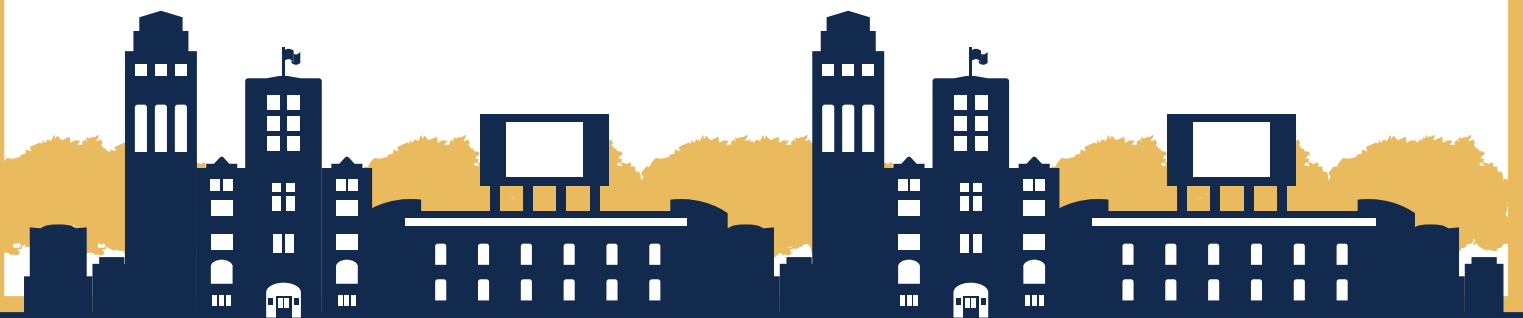

# Table of Contents

*Click or tap on each heading to go directly to that page*

**Welcome from Dr. Neumar** ..... **3**

**Conference Agenda** ..... **4**

**Location Maps** ..... **6**

- Michigan Union Building
- Downtown Ann Arbor

**Our Sponsors** ..... **8**

**Panelists & Speakers** ..... **19**

- Conference Officials & Guest Speakers
- Wolf Creek XVII Panelists
- Innovator Award Presenters

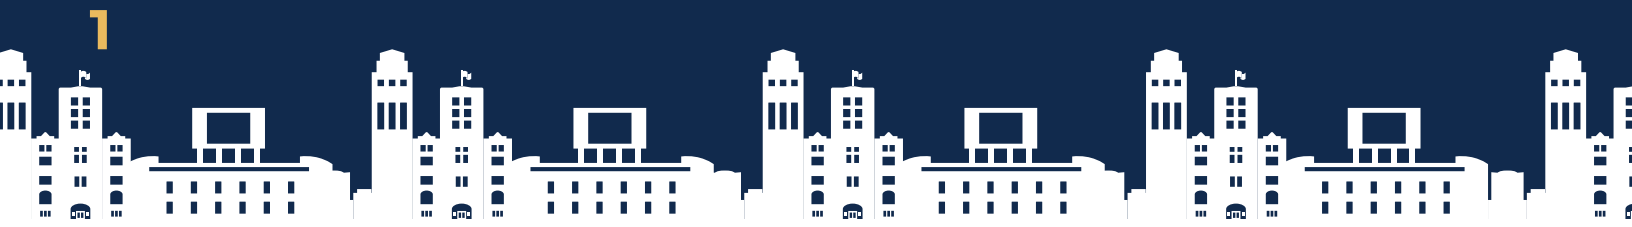



## WOLF CREEK XVII

was made possible through  
the generous support of the  
Weil Family Foundation

“WHOEVER  
SAVES **ONE**  
**LIFE...**

...**SAVES THE**  
**WORLD**  
**ENTIRE.”**

## Welcome to Wolf Creek XVII!

We thank you all for taking the time to participate in what we hope will be an impactful meeting for both the participants and the field of cardiac arrest resuscitation.

Aligned with the purpose and goals of the first Wolf Creek Conference in 1975, we have gathered to devote ourselves to informal and challenging discussion that will lead to the propagation of ideas among individuals from academia and industry with different backgrounds, interests, and expertise.

Unlike traditional scientific meetings that focus on the dissemination of knowledge, we will spotlight the **gaps** in our knowledge, the **barriers** to translating the knowledge we have, and the **priorities** for our research efforts moving forward with the ultimate goal of improving cardiac arrest outcomes. We will also celebrate the future leaders in the field through our innovator competition. Finally, we hope this meeting will nurture the culture of our community, re-energize our teams, and facilitate new partnerships that will accelerate our progress.

In the concluding statement of the first Wolf Creek Conference, Peter Safar wrote “The ultimate goal of resuscitology is the restoration of lives cut short before fulfillment.” It is difficult to think of an endeavor more worthy of our efforts.

### **Robert W. Neumar, M.D., Ph.D.**

*Chair, Wolf Creek Conference  
Professor and Chair, Emergency Medicine,  
University of Michigan and Michigan Medicine*

## PRE-CONFERENCE

JUNE 14

6:00 PM Welcome reception at Graduate Hotel Regency Ballroom

## WOLF CREEK DAY 1

JUNE 15

*Guests staying at the Graduate Hotel walk to the Union (approx. 10-minute walk)*

8:00 AM Registration/Breakfast at Rogel Ballroom (2<sup>nd</sup> Floor of Union)

8:30 AM Weil Institute & Wolf Creek Welcome

*Robert Neumar, MD, PhD; Kevin Ward, MD; Carol Weil*

9:00 AM Words from a Survivor - Jerry Parris

9:20 AM Panel Introduction and Voting Demonstration

9:35 AM **PANEL: AUTOMATED CARDIAC ARREST DIAGNOSIS**

*Theresa Mariero Olasveengen, MD, PhD; Michael H. Sayre, MD;*

*Jacob Sunshine, MD, MS; Wisse van den Beuken, MD*

11:05 AM Break

11:20 PM **PANEL: AMPLIFYING LAY-RESCUER RESPONSE**

*Katie Dainty, PhD; Ruud Koster, MD, PhD; Yih Yng Ng, MD, MBBS, MPH, MBA;*

*Marcus Ong, MBBS, FRCSEd (A&E), FAMS, MPH*

12:50 PM "Science Flash" Presentations

1:00 PM Lunch

1:30 PM **INNOVATOR AWARD PRESENTATIONS**

*Carolina Barbosa Maciel, MD, MSCR; Adam Gottula, MD;*

*Rajat Kalra, MBChB, MS; Ryan Morgan, MD, MTR;*

*Mitsuaki Nishikimi, MD; Jacob Sunshine, MD, MS*

3:00 PM **INNOVATOR AWARD RANKING**

3:30 PM Academic and Industry Networking Session + Free Time

5:00 PM Buses to stadium pick up guests outside Graduate Hotel

5:30 PM Tour of Michigan Stadium & Group Photo

6:30 PM "Sudden Cardiac Arrest in Athletic Medicine -  
NFL Emergency Preparedness"

*Jim Ellis, MD*

7:00 PM Dinner Served

8:30 PM Buses depart Stadium to return to Graduate Hotel

## WOLF CREEK DAY 2

JUNE 16

- 8:00 AM** Breakfast at Michigan Union Rogel Ballroom
- 8:30 AM** Recap of Day 1 and Announcements
- 9:00 AM** **PANEL: MOBILE AEDs**  
*Christine Brent, MD, FAEMS, FACEP; Steven C. Brooks, MD, MHSc, FRCPC; Maaret Castrén, MD, PhD; Sheldon Cheskes, MD*
- 10:30 AM** Break Time
- 10:45 AM** **PANEL: PHYSIOLOGY GUIDED CPR**  
*Janet Bray, RN, PhD; Sam Parnia, MD, PhD; Thomas Rea, MD, MPH; Robert Sutton, MD, MSCE, FAAP, FCCM, FAHA; Lars Wik, MD, PhD*
- 12:15 PM** “Case Study: Lessons Learned from Damar Hamlin”  
*Jim Ellis, MD; Denny Kellington, ATC, MA; Daryl Conway, MA, AT, ATC*
- 12:45 PM** American Heart Association Presentation
- 1:00 PM** Lunch
- 1:30 PM** **PANEL: MECHANICAL CIRCULATORY SUPPORT**  
*Jason Bartos, MD, PhD; Jan Bělohávek, MD, PhD; Cindy Hsu, MD, PhD, MS, FCCM; Georg Trummer, MD; Demetri Yannopoulos, MD*
- 2:45 PM** Break Time
- 3:00 PM** **PANEL: INDUSTRY RESEARCH PRESENTATIONS**
- 4:30 PM** Free Time: Guests are encouraged to explore Ann Arbor
- 6:30 PM** Wolf Creek Tent Opens at Ann Arbor Music Festival

## WOLF CREEK DAY 3

JUNE 17

- 8:00 AM** Breakfast at Michigan Union Rogel Ballroom
- 8:30 AM** Recap of Day 2 and Announcements
- 9:00 AM** **PANEL: NEUROPROTECTION**  
*Karen G. Hirsch, MD; Todd Kilbaugh, MD; Giuseppe Ristagno, MD, PhD; Mypinder Sekhon, MD, PhD; Tomoyoshi Tamura, MD, PhD*
- 10:30 AM** Summing it Up: Gaps, Barriers and Priorities
- 12:00 PM** Conference Close

# WOLF CREEK CONFERENCE KEY LOCATIONS

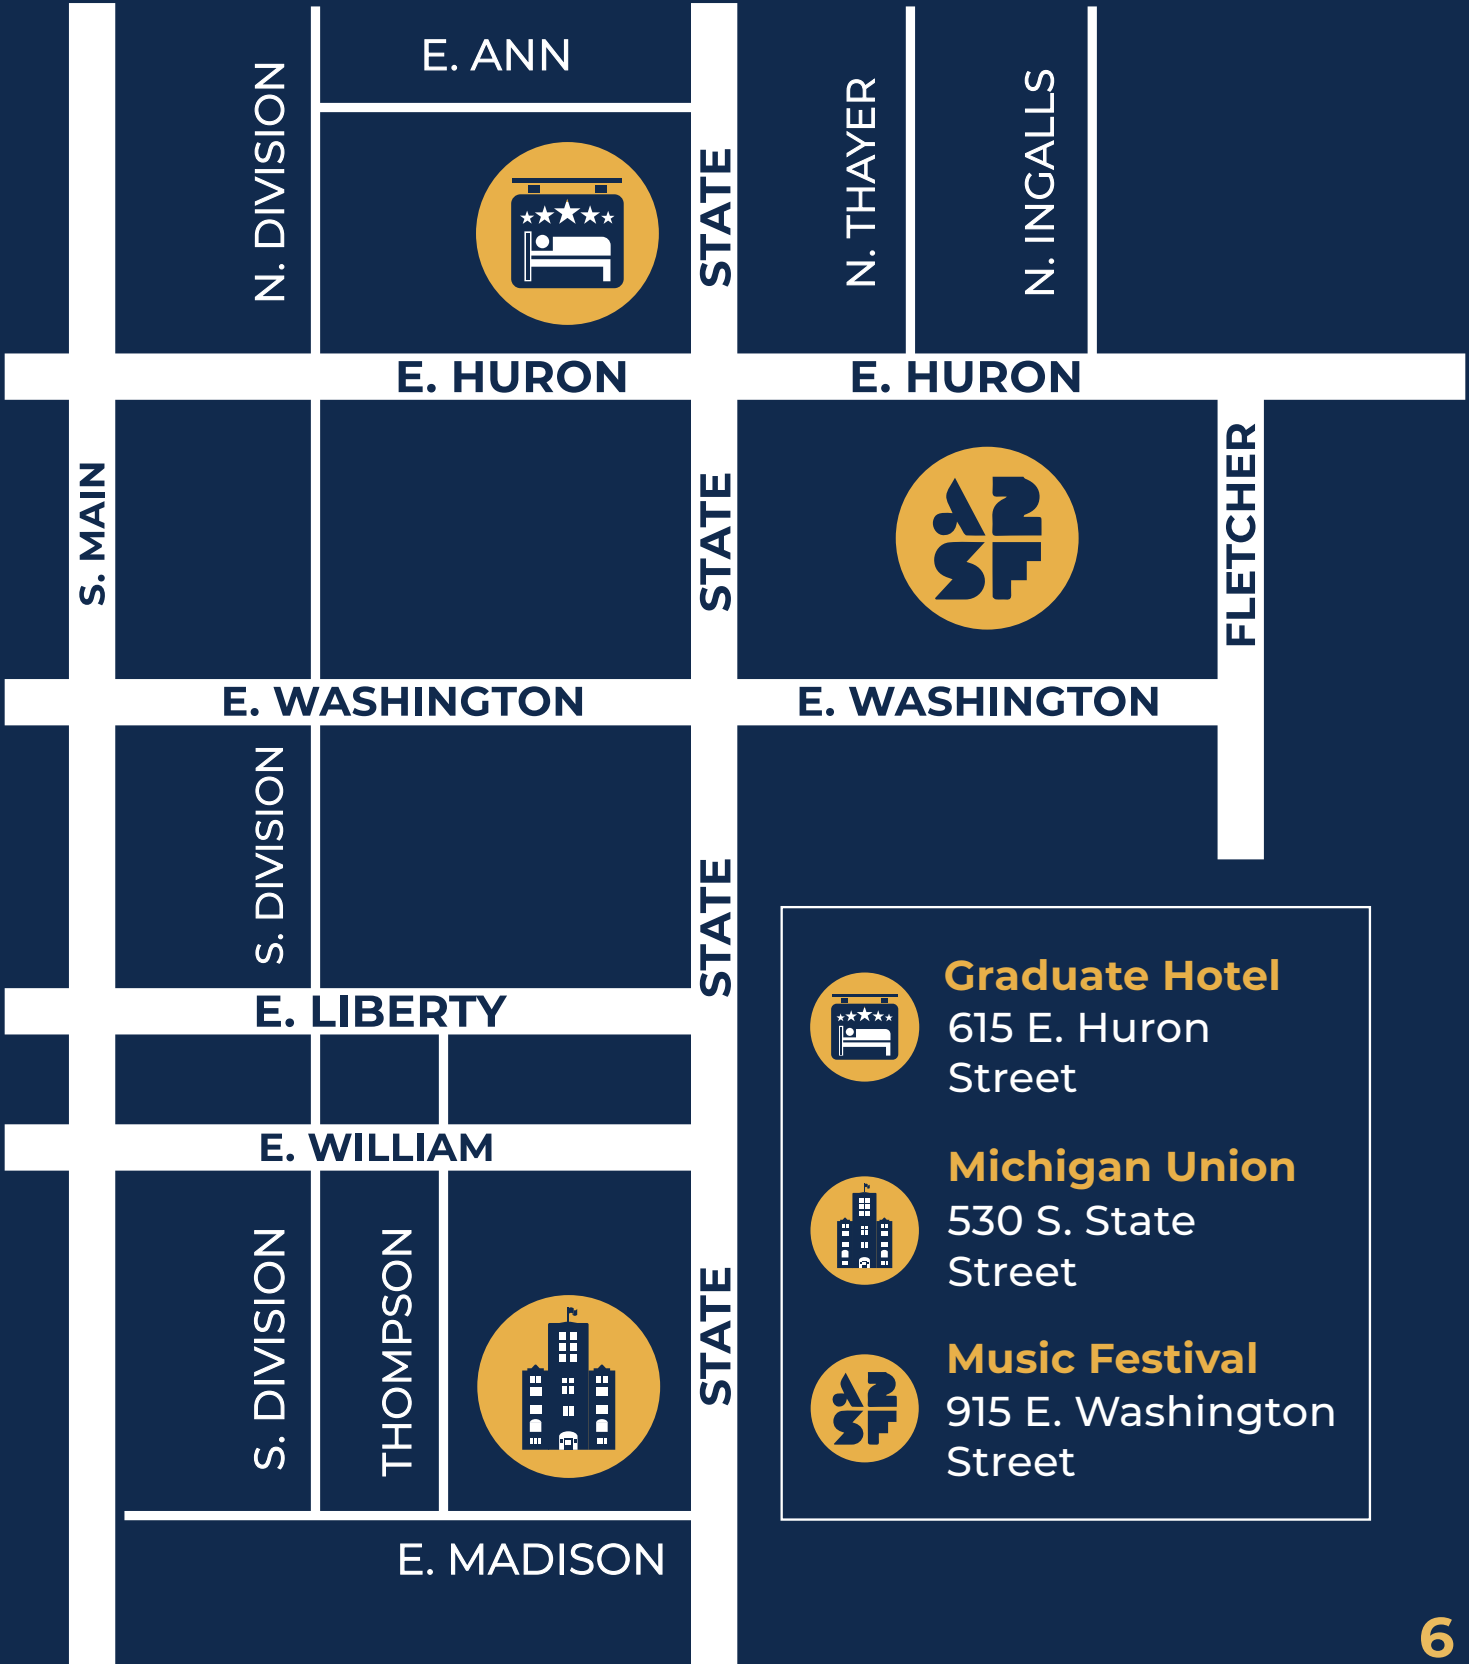

- 

**Graduate Hotel**  
615 E. Huron Street
- 

**Michigan Union**  
530 S. State Street
- 

**Music Festival**  
915 E. Washington Street

# Michigan Union Building

## FLOOR 1

**Welker and Michigan rooms are available for attendees in need of a space for meetings and phone calls.**

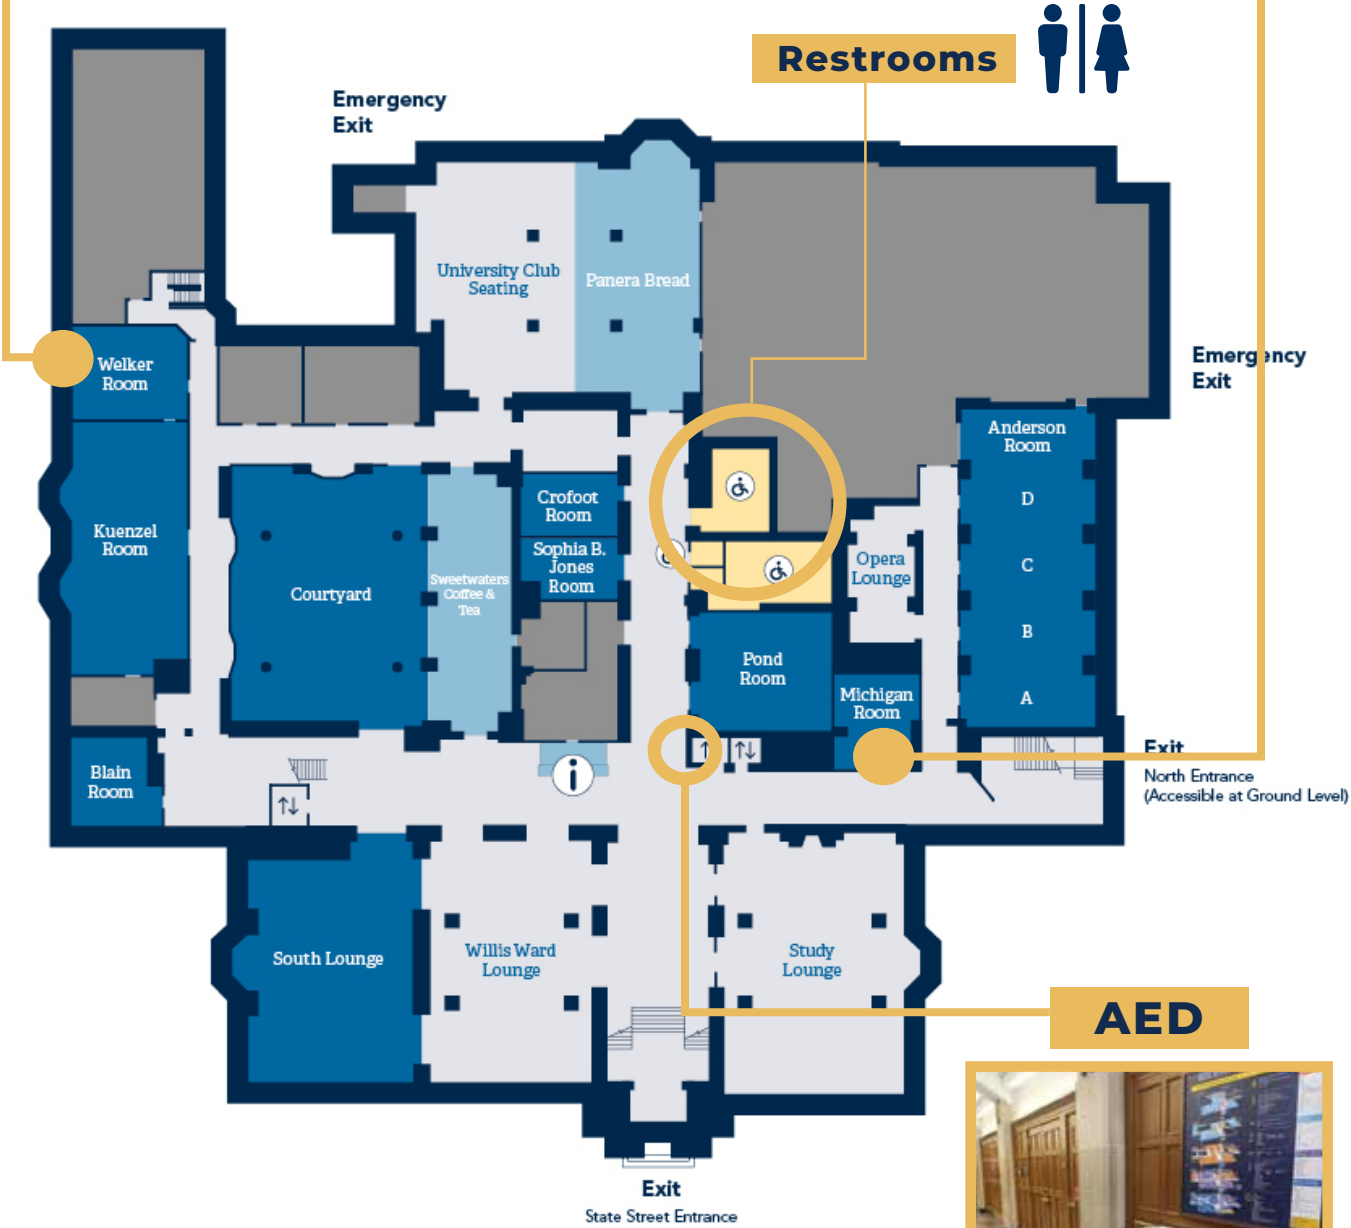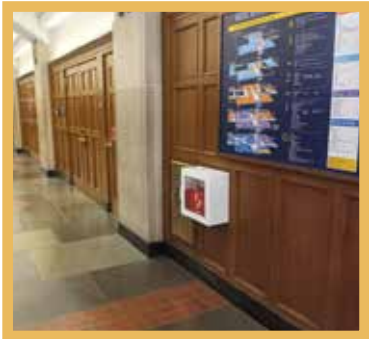



# Michigan Union Building

## FLOOR 2

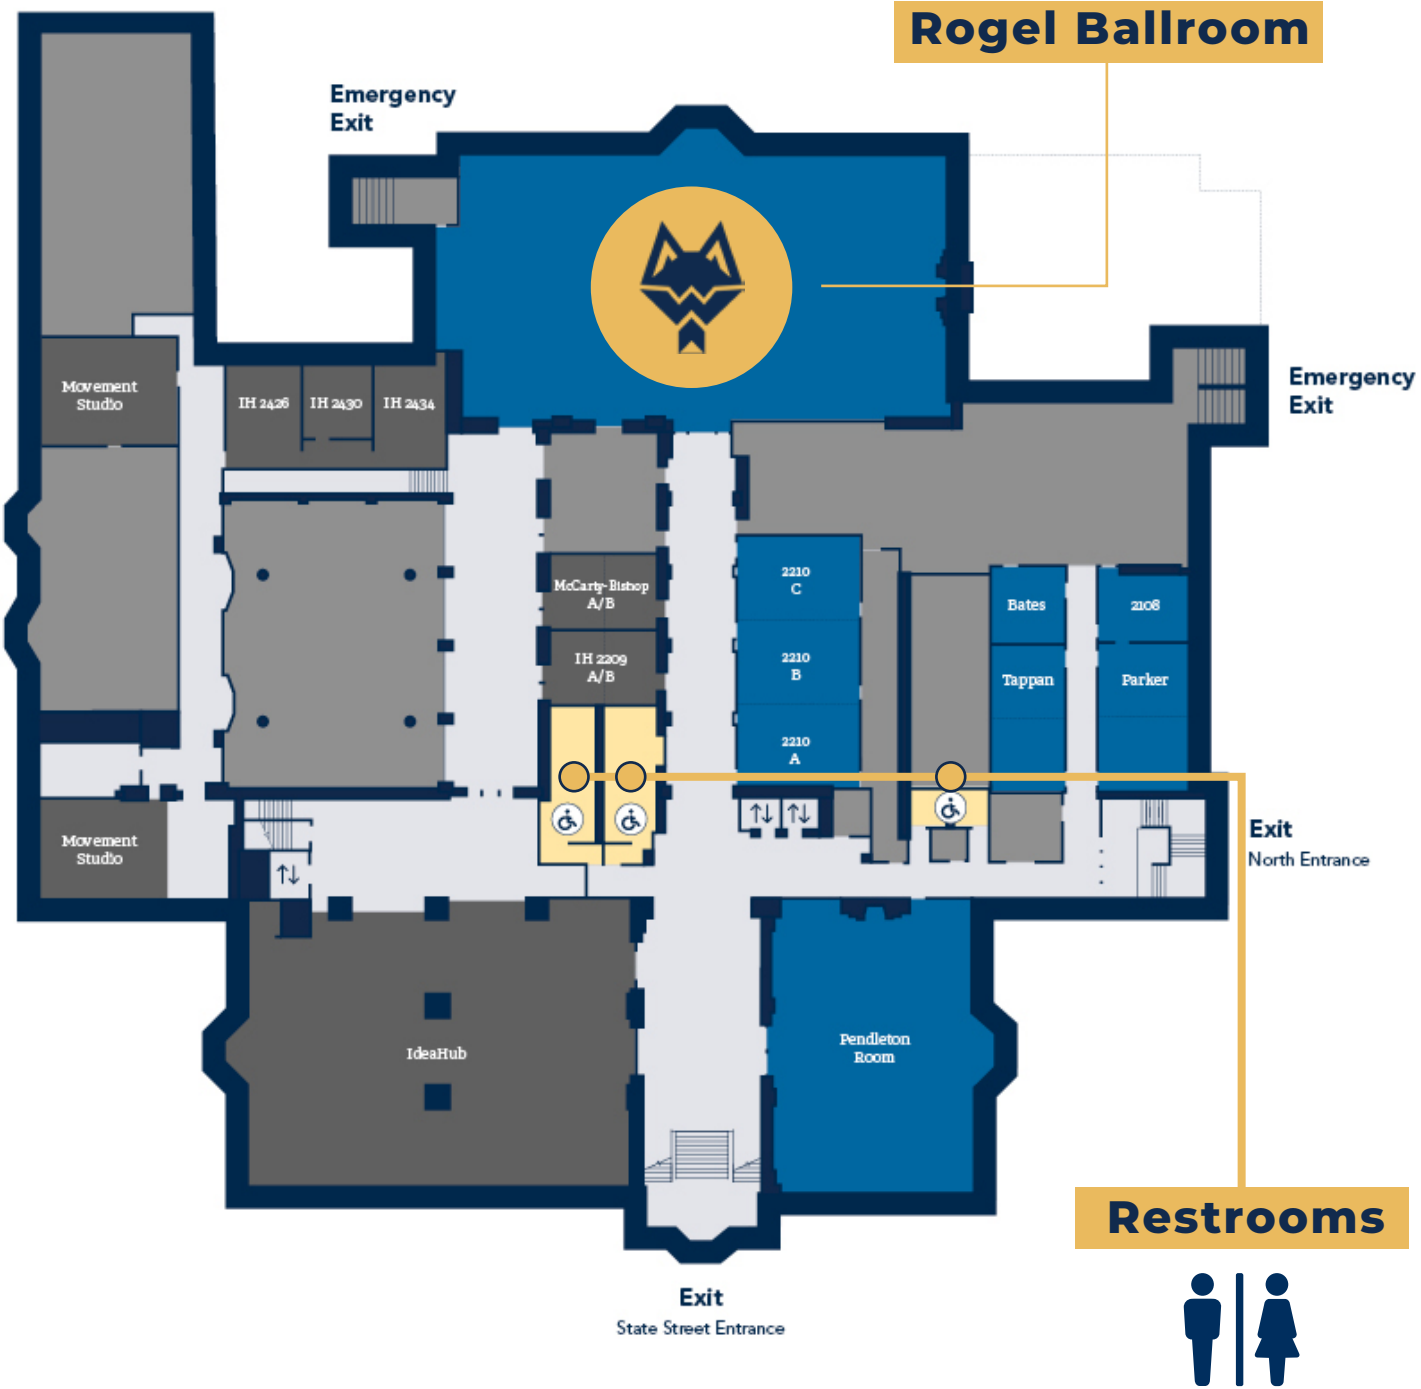

# Thank You to **Our Sponsors!**

---

## PLATINUM

---

**ZOLL**®

**stryker**

---

## GOLD

---

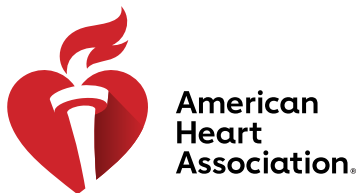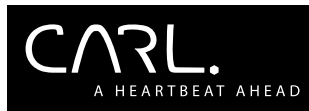

**PHILIPS**

---

## SILVER

---

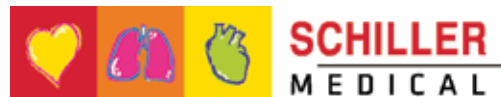

stryker

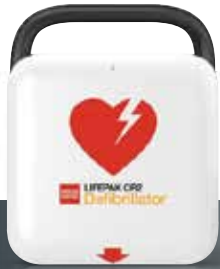

**LIFEPAK® CR2**  
AED

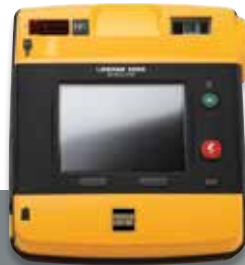

**LIFEPAK 1000**  
defibrillator

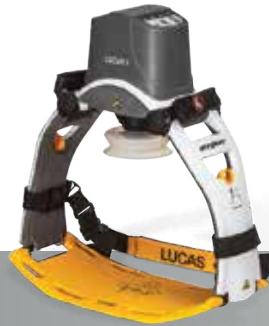

**LUCAS® 3, v3.1**  
chest compression system

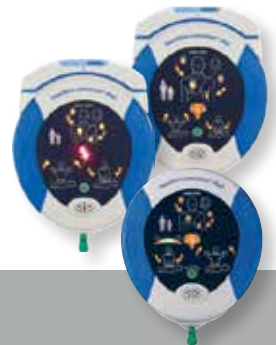

**HeartSine®**  
AEDs

Stryker or its affiliated entities own, use, or have applied for the following trademarks or service marks: HeartSine, LIFEPAK, LUCAS, Stryker. All other trademarks are trademarks of their respective owners or holders. The absence of a product, feature, or service name, or logo from this list does not constitute a waiver of Stryker's trademark or other intellectual property rights concerning that name or logo.  
Copyright © 2023 Stryker. 02/2023

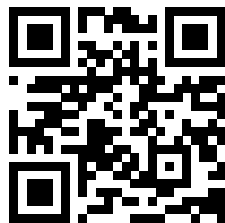

Scan the code or visit

[stryker.com/emergencycare](https://stryker.com/emergencycare)

to learn more about  
Stryker's products

## RescueNet® CaseReview

PROVIDING INSIGHTS TO IMPROVE OUTCOMES

**ZOLL® RescueNet CaseReview** supports clinicians by providing insights that can help providers improve patient outcomes.

- **Immediate post-call data delivery:** quickly and seamlessly transmit essential clinical data
- **Same-day debriefing:** review all data related to patients in respiratory distress and sudden cardiac arrest events
- **System-wide quality improvement:** identify trends and areas for improvement
- **Training metrics:** establish quality standards for training purposes

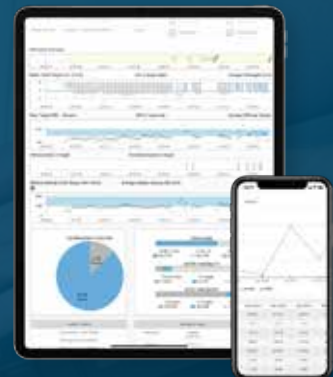

For more information, visit us at [zoll.com](https://zoll.com)

ZOLLMedical @zollmedical @MedicalZoll zoll.com 800-804-4356

**ZOLL®**

© 2023 ZOLL Medical Corporation. All rights reserved. RescueNet and ZOLL are trademarks or registered trademarks of ZOLL Medical Corporation in the United States and/or other countries. MCN EP 2101 0356

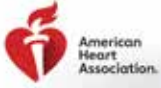

American Heart Association

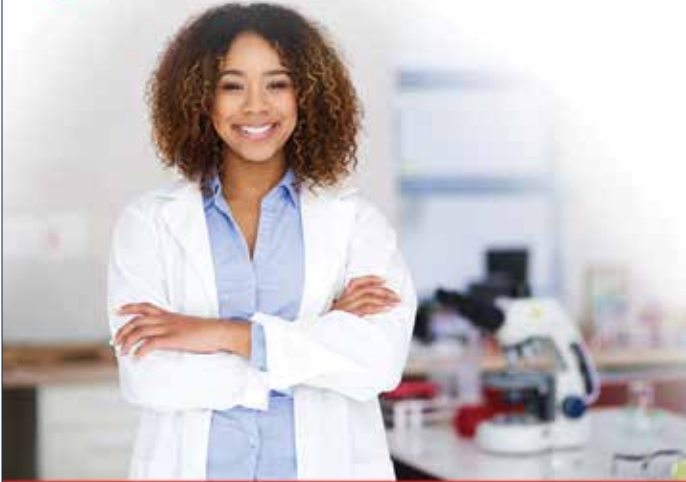

## Get to know the data side of Get With The Guidelines®

Learn more about program research and funding opportunities today

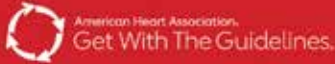

[www.heart.org/qualityresearch](http://www.heart.org/qualityresearch)

20-154

## The monitor you've been waiting for is here

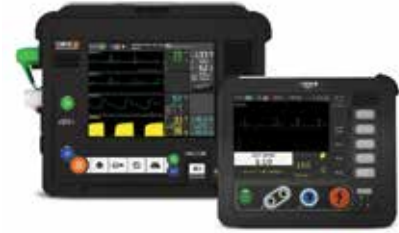

The powerful and scalable **Tempus ALS** platform helps you meet the challenges you are facing in EMS today, and into the future.

- Next generation battery technology
- Lightweight, modular footprint
- Streaming data eliminates manual uploads to ePCR
- Connects live waveforms/numerics for data sharing
- Color touchscreen allows quick menu navigation and event entry
- HIPAA compliant, integrated camera
- Plug and Play Upgradable

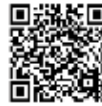

Please scan the QR code to learn more about Tempus ALS

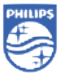

# CARL.

A HEARTBEAT AHEAD

## The Next Level of ECPR

Targeted Reperfusion after Sudden Cardiac Arrest

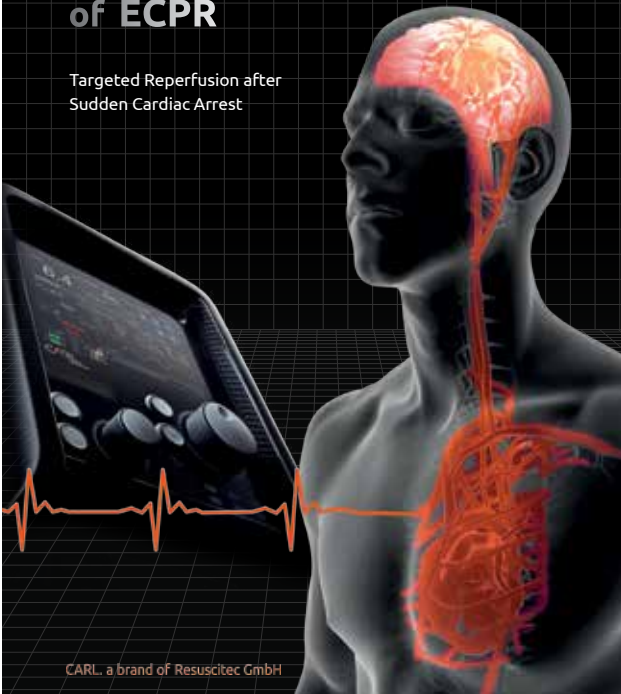

CARL, a brand of Resuscitec GmbH

## Thank you for supporting **WOLF CREEK XVII!**

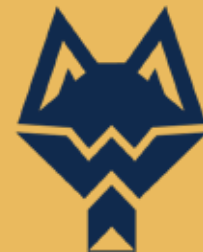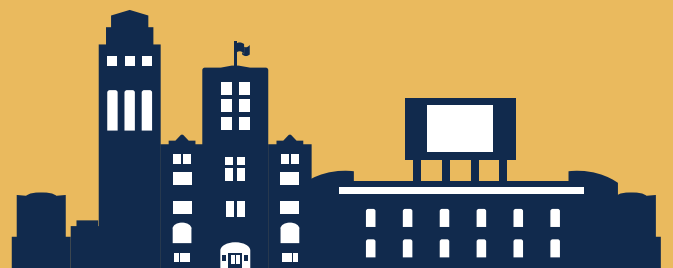

# Officials & Guest Speakers

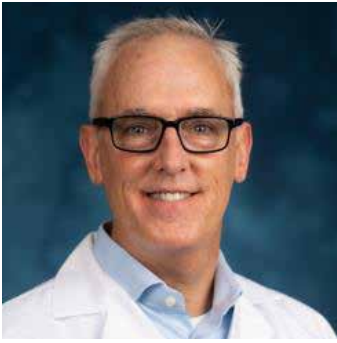

## **Robert W. Neumar, MD, PhD**

*Chair, Wolf Creek Program; Professor and Chair, Emergency Medicine, University of Michigan*

Dr. Neumar has over 20 years of research experience in the field of cardiac arrest resuscitation and traumatic brain injury. A major focus of Dr. Neumar's laboratory has been to elucidate the role of calpains in post-ischemic neuronal death and has also focused on optimizing post-cardiac arrest hypothermic targeted temperature management (HTTM). The major focus of his clinical research is optimizing the management of post-cardiac arrest syndrome.

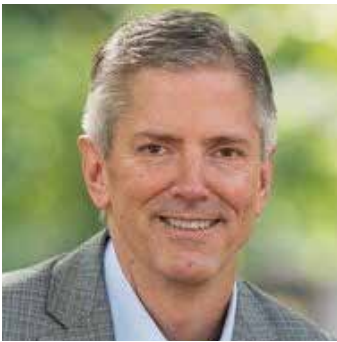

## **Kevin Ward, MD**

*Executive Director, Max Harry Weil Institute for Critical Care Research and Innovation; Professor, Emergency Medicine and Biomedical Engineering, University of Michigan*

Dr. Ward's research interests span the field of critical illness and injury ranging from combat casualty care to the intensive care unit. His approach is to develop and leverage broad platform technologies capable of use throughout all echelons of care of the critically ill and injured as well as in all age groups. Dr. Ward's passion is in creating programs which encourage true integration across the disciplines of medicine, engineering, data sciences, and entrepreneurship that accelerate discovery to true patient impact.

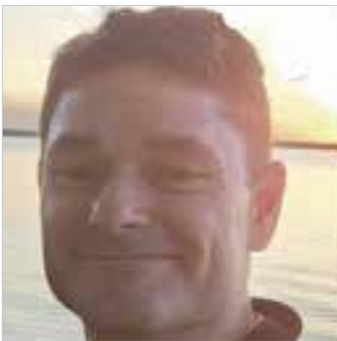

## **Jerry Parris**

*Cardiac Arrest Survivor*

April 10th, 2023, marked one year since Jerry survived an out-of-hospital cardiac arrest (OHCA). A healthy, athletic 50-year-old was teaching a local youth group how to play ultimate frisbee when he suddenly collapsed, and it was a 12-year-old girl who recognized Jerry needed help and ran to get an adult.

Jerry is alive today thanks to early recognition and immediate CPR by a pair of bystanders who knew CPR.

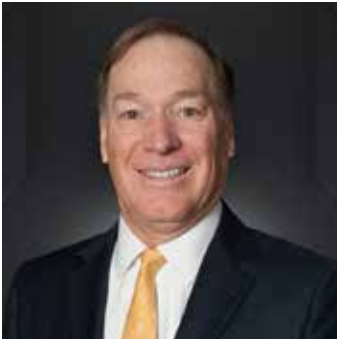

## **Jim Ellis, MD**

*Chief Medical Officer, USFL Player Health and Safety*

Dr. Ellis has supported numerous sports programs throughout his distinguished career. In the early 1990s, he was the medical director for the Atlanta Motor Speedway and the LPGA Chick-fil-A tournament. He was also a senior consultant with Medical Sports Group that coordinated team medical care for the NFL at the Super Bowl for more than 25 years and worked 13 seasons as the emergency physician/associate team physician for the Atlanta Falcons.

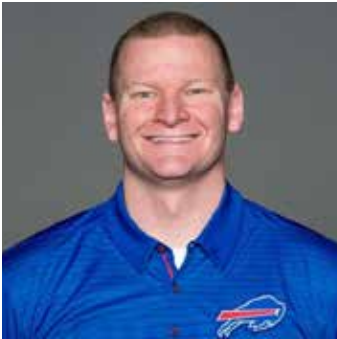

## **Denny Kellington, ATC, MA**

*Assistant Athletic Trainer, Buffalo Bills*

Denny Kellington has been an assistant athletic trainer with the Buffalo Bills since 2017. He spent the previous 11 years working for Syracuse University as an assistant athletic trainer as well as with the Denver Broncos.

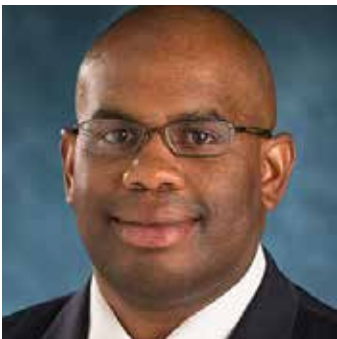

## **Darryl Conway, MA, AT, ATC**

*Senior Associate Athletic Director; Chief Health & Welfare Officer; University of Michigan Athletics*

In his role at the University of Michigan, Darryl Conway oversees Athletic Medicine, Performance Science, Performance Nutrition, Olympic Strength and Conditioning, and Equipment Operations personnel, as well as serving as a liaison to the Athletic Counseling Team & Team Physicians from Michigan Medicine and the University of Michigan University Health Services. His professional interests lie in the fields of Emergency Planning, Catastrophic and Crisis Response; Athletics Risk Management; Advanced Wound Care; Opioid Overdose Management; Exertional Heat Injury Management, and On-Field Management of Cervical Spine Injuries.

## **Wolf Creek Polos & T-shirts**

Available at: [www.aatwebstore.com/WC\\_C](http://www.aatwebstore.com/WC_C)

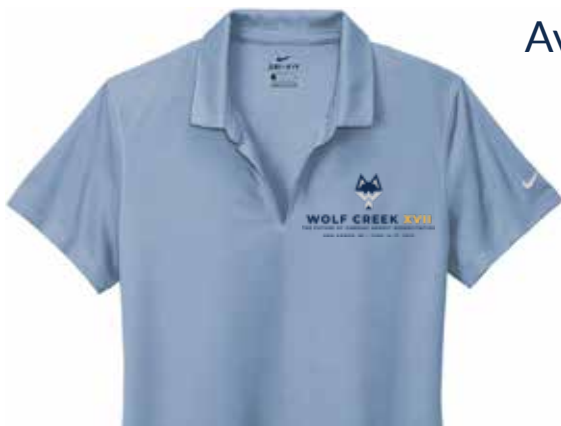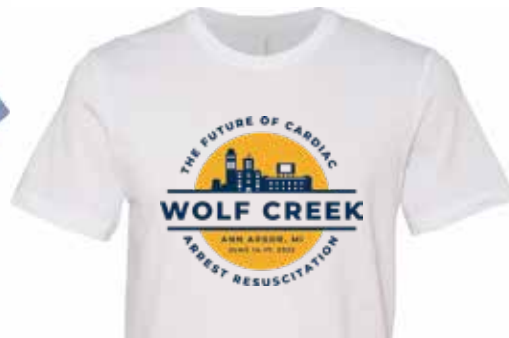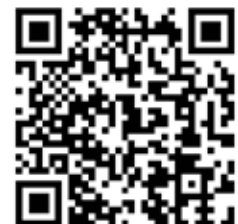

# Wolf Creek Panelists

## AUTOMATED CARDIAC ARREST DIAGNOSIS

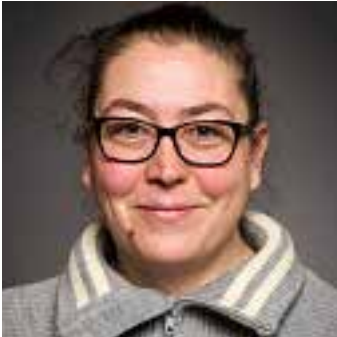

### **Theresa Mariero Olasveengen, MD, PhD**

*Adjunct Professor, Anesthesia and Intensive Care Medicine, Oslo University Hospital*

Dr. Olasveengen is a cardiac arrest researcher with special interest in post-arrest brain injury. She is a member of the Science Advisory Committee for the International Liaison Committee on Resuscitation (ILCOR), the Advanced Life Support Science and Education Committee for the European Resuscitation Council (ERC) and board member of the Norwegian Cardiac Arrest Registry.

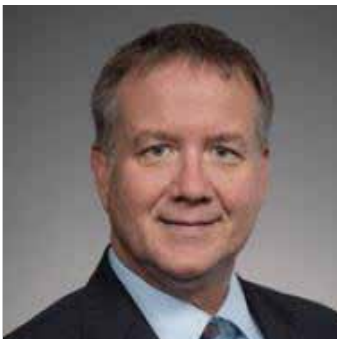

### **Michael H. Sayre, MD**

*Professor, Emergency Medicine, University of Washington; Medical Director, Seattle Fire Department*

Dr. Sayre oversees a broad research portfolio focused on minority health and health disparities, including research on the potential of precision medicine to address care gaps for underserved populations. He also serves on advisory and leadership committees in partnership with NIH. Prior to joining NIMHD, Dr. Sayre was the deputy director of the Division of Research Infrastructure in NIH's National Center for Research Resources, which later became the National Center for Advancing Translational Sciences (NCATS). Earlier in his career, he conducted independent research on fundamental mechanisms of gene regulation as a faculty member at Johns Hopkins University in Baltimore, Maryland.

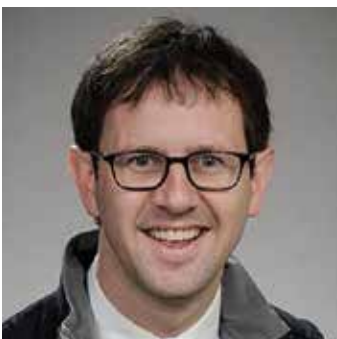

### **Jacob Sunshine, MD, MS**

*Associate Professor, Anesthesiology & Pain Medicine, University of Washington*

Dr. Sunshine is an Associate Professor at the University of Washington School of Medicine, in the Department of Anesthesiology and Pain Medicine and is adjunct faculty in the Paul G. Allen School of Computer Science and Engineering. His lab focuses on translational applications of remote sensing using commodity devices such as smartphones and speakers, with a focus on passive detection of signs of cardiopulmonary arrest.

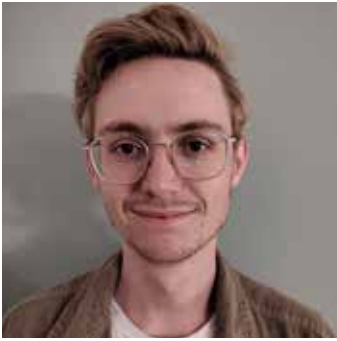

## **Wisse van den Beuken, MD**

*PhD Candidate, Anesthesiology, Amsterdam UMC, VUmc*

Wisse van den Beuken works as a PhD student at the Department of Anesthesiology of the Amsterdam UMC, location VUmc. His research focuses on automated cardiac arrest detection.

## **AMPLIFYING LAY-RESCUER RESPONSE**

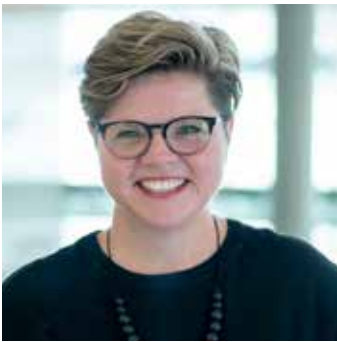

## **Katie Dainty, PhD**

*Research Chair, Patient-Centered Outcomes, North York General Hospital, University of Toronto*

Dr. Dainty is a researcher focused on issues related to patient and family experience, implementation science, patient-centered outcome measures and quality improvement in community health care environments. Her research focuses on using robust

qualitative methods to unpack long-held assumptions about bystander experience and survivorship following sudden cardiac arrest.

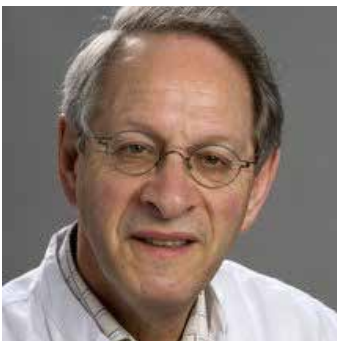

## **Ruud Koster, MD, PhD**

*Professor, Cardiology; Professor, ACS - Heart Failure & Arrhythmias; Amsterdam UMC*

Dr. Koster initiated the AmsteRdam REsuscitation STudies (ARREST) in 1992, a registry of out-of-hospital cardiac arrest in part of the Netherlands, which is still ongoing. His research involves all aspects of basic life support and defibrillation, more

recently focused on implementation of AEDs in the home environment.

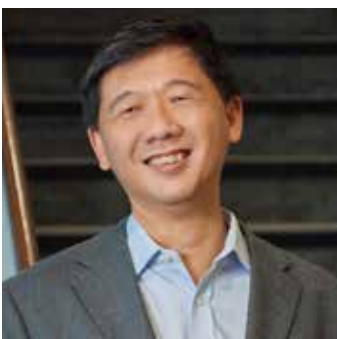

## **Yih Yng Ng, MD, MBBS, MPH, MBA**

*Deputy Clinical Director, Ng Teng Fong Center for Health Innovation; Director, Digital and Smart Health Office, Tan Tock Seng Hospital*

Dr. Ng is a public health physician overseeing healthcare policy for Singapore's Ministry of Home Affairs and the Director of the Digital and Smart Health Office at The Center for Health

Innovation. His interests are in EMS systems, resuscitation, digital health and population health.



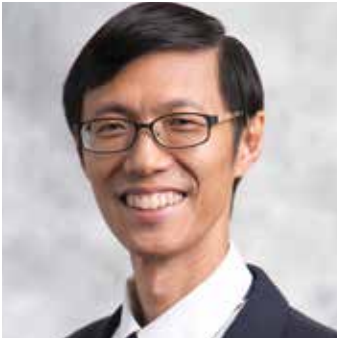

**Marcus Ong, MBBS, FRCSEd (A&E),  
FAMS, MPH**

*Senior Consultant; Director of Research; Clinician Scientist,  
Emergency Medicine, Singapore General Hospital*

Prof. Ong is Senior Consultant, Director of Research, and Clinician Scientist in the Department of Emergency Medicine at Singapore General Hospital. His research studies focus on pre-

hospital emergency care, medical devices, data science and health services.

## MOBILE AEDs

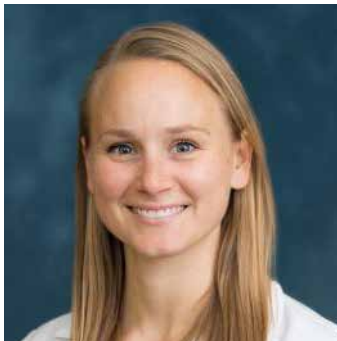

**Christine Brent, MD, FAEMS, FACEP**

*Clinical Assistant Professor, Emergency Medicine; Assistant  
Medical Director, Survival Flight, University of Michigan*

Dr. Brent is a Clinical Assistant Professor of Emergency Medicine at the University of Michigan. She holds several positions within the department, including Chief of the Division of Emergency Medical Services, Assistant Medical Director of Survival Flight,

and Program Director of the EMS Fellowship.

Dr. Brent has a specific research interest in the utilization of drones in prehospital medicine and has garnered industry funding for this work.

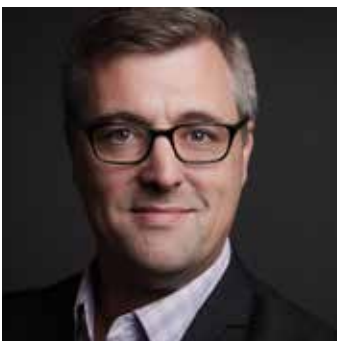

**Steven C. Brooks, MD, MHSc, FRCPC**

*Associate Professor, Emergency Medicine, Queen's University;  
Chief Medical Officer, Rapid Response Revival*

Dr. Brooks's work focuses on novel strategies and technology to improve the community response to out-of-hospital cardiac arrest (OHCA).

His current projects involve a novel mobile device application to crowdsource basic life support for those who experience OHCA, a pilot program involving CPR-trained and AED-equipped lay volunteers for the paramedic service in communities at risk for longer paramedic response times, and an observational study using a large administrative dataset to characterize mental illness and related health services use among survivors of OHCA.

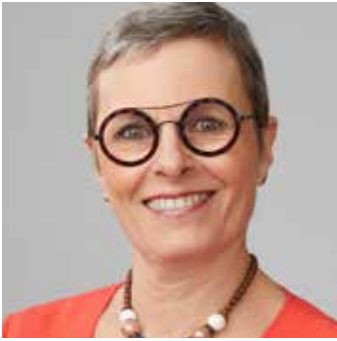

### **Maaret Castrén, MD, PhD**

*Professor, Emergency Medicine and Services,  
Helsinki University Hospital*

Dr. Castrén leads prehospital and emergency care for the region of Uusimaa in Finland and has over 800,000 patient contacts each year.

She became the first Professor of Emergency Medicine in Sweden at Karolinska Institutet 2007, and at Helsinki University 2016. She is the Past Chair of the European Resuscitation Council and the Honorary Secretary of ILCOR.

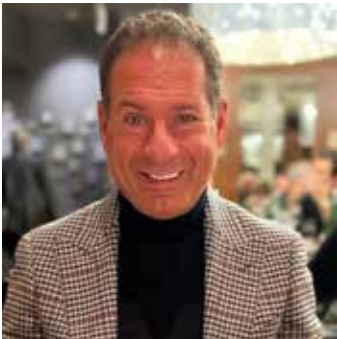

### **Sheldon Cheskes, MD**

*Professor, Emergency Medicine, Family and Community  
Medicine, University of Toronto*

Dr. Cheskes is a Professor with the Division of Emergency Medicine, Department of Family and Community Medicine at the University of Toronto, a scientist at the Li Ka Shing Knowledge Institute at St. Michael's Hospital and an affiliate

scientist at Sunnybrook Research Institute. He is one of the principal investigators for the Canadian Resuscitation Outcomes Consortium and is a recognized international authority in the area of CPR quality and out-of-hospital cardiac arrest resuscitation.

## **PHYSIOLOGY-GUIDED CPR**

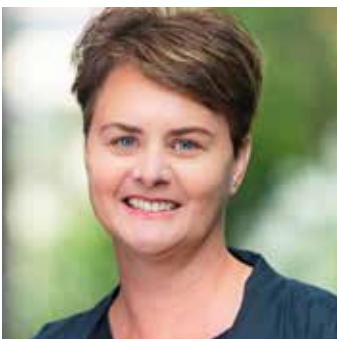

### **Janet Bray, RN, PhD**

*Associate Professor, Pre-hospital, Emergency and Trauma Unit,  
School of Public Health and Preventative Medicine,  
Monash University*

Prof. Bray's background in cardiac and intensive care nursing has driven her research career to improve outcomes for critically ill cardiovascular patients—particularly those experiencing cardiac arrest, heart attack and stroke.

Dr. Bray's research program aims to improve the public's recognition and response to acute cardiovascular symptoms and improve the evidence-base for acute cardiovascular care. Her published research includes multicenter randomised control trials (AVOID, RINSE).

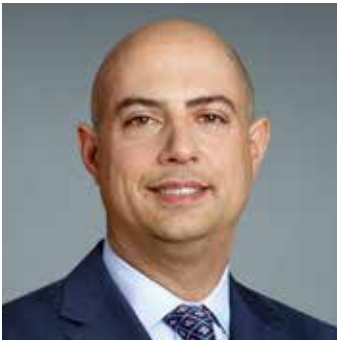

## **Sam Parnia, MD, PhD**

*Associate Professor, Medicine, NYU Langone Medical Center*

Dr. Parnia is Associate Professor of Medicine at the NYU Langone Medical Center, where he is also director of research into cardiopulmonary resuscitation.

In the United Kingdom, Dr. Parnia is Director of the Human Consciousness Project at the University of Southampton. He is known for his work on near-death experiences and cardiopulmonary resuscitation.

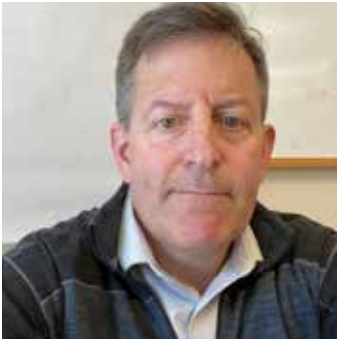

## **Thomas Rea, MD, MPH**

*Professor and Section Head, General Internal Medicine, University of Washington*

Dr. Rea is an internist in Seattle, Washington and is affiliated with multiple hospitals in the area, including UW Medicine-University of Washington Medical Center and UW Medicine-Harborview Medical Center. Dr. Rea received his medical degree from

University of Michigan Medical School and has been in practice for more than 20 years.

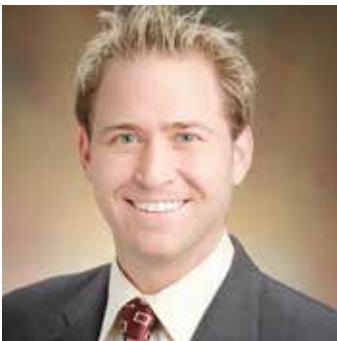

## **Robert Sutton, MD, MSCE, FAAP, FCCM, FAHA**

*Professor, Anesthesia, Critical Care Medicine, Pediatrics, University of Pennsylvania, Children's Hospital of Philadelphia (CHOP)*

Dr. Sutton is an internationally recognized expert in pediatric cardiac arrest resuscitation. His career is focused on developing and evaluating novel techniques and devices to improve the care delivered during in-hospital resuscitation attempts. He is

the immediate past Chair of the AHA's National Get With the Guidelines-Resuscitation Registry Pediatric Research Task Force and has been a main author of either the Pediatric Advanced or Basic Life Support Guidelines since 2015.

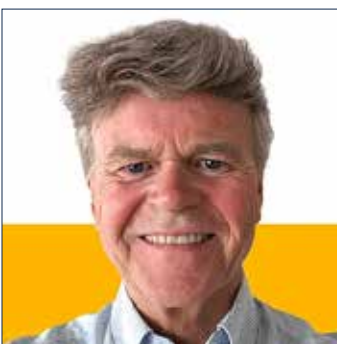

## **Lars Wik, MD, PhD**

*Senior Consultant, Anesthesiology, Oslo University Hospital*

Dr. Wik is a Senior Consultant of Anaesthesiology at Oslo University Hospital and the Norwegian National Advisory Unit on pre-hospital Emergency Medicine (NAKOS), where he also holds a position as a Senior Researcher. Since 1985, Dr. Wik has been active in conducting clinical and experimental research into mechanical CPR and holds several patents related to Emergency

Medicine technology. His main interests are CPR, trauma, and new technologies for surveillance of vital symptoms and measurements.

# MECHANICAL CIRCULATORY SUPPORT

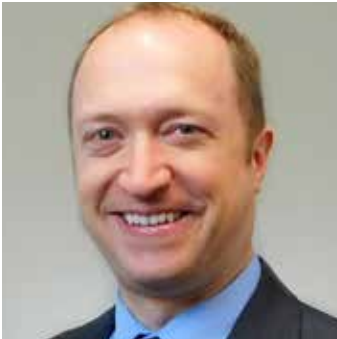

## **Jason Bartos, MD, PhD**

*Associate Professor, Cardiology, University of Minnesota*

Dr. Bartos is Associate Professor of Cardiology at the University of Minnesota where he works as a critical care physician and interventional cardiologist. He is also the Section Head of the Critical Care Cardiology section of the Cardiology Division, Medical Director of the Cardiovascular Intensive Care Unit, and the Associate Director of the Center for Resuscitation

Medicine where he has worked to develop the University of Minnesota extracorporeal cardiopulmonary resuscitation program and the mobile ECMO program covering the Twin City metro area.

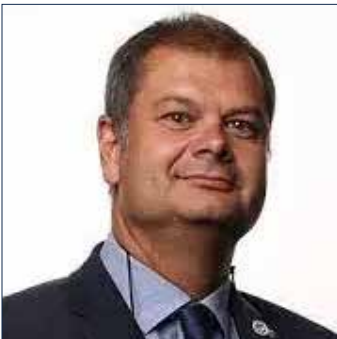

## **Jan Bělohávek, MD, PhD**

*Head, Cardiovascular Surgical Intensive Care Unit, Department of Cardiovascular Surgery, University of Freiburg*

Dr. Bělohávek is active in clinical research with a main focus on refractory cardiac arrest, ECPR (extracorporeal cardiopulmonary resuscitation) ECMO reperfusion, microcirculation, different ECMO settings.

He is the main investigator of the Prague OHCA study comparing ECPR/invasive based approach to standard therapy in refractory cardiac arrest published in JAMA 2022. Dr. Bělohávek also participated in the ECMO-CS cardiogenic shock study published in Circulation 2023, evaluating the role of ECMO in severe cardiogenic shock.

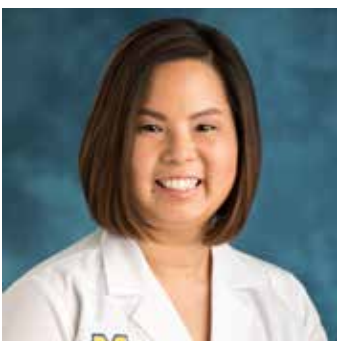

## **Cindy Hsu, MD, PhD, MS, FCCM**

*Division Chief, Critical Care; Assistant Professor, Emergency Medicine and Acute Care Surgery, University of Michigan*

Dr. Hsu is an emergency medicine physician and surgical intensivist who cares for patients in Michigan Medicine's Adult Emergency Department, Emergency Critical Care Center, and Trauma/Burn Intensive Care Unit.

Dr. Hsu strives to transform cardiac arrest care by dismantling the gaps between translational research and clinical implementation, with an emphasis on improving the neurologic outcome of cardiac arrest patients. Her research has spanned from large animal models to clinical trials of out-of-hospital cardiac arrest and other acute conditions, to mixed methods research on emergency trial conducts.

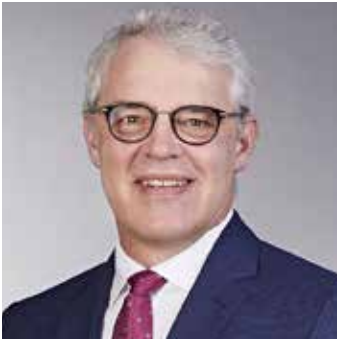

### **Georg Trummer, MD**

*Head, Cardiovascular Surgical Intensive Care Unit, Department of Cardiovascular Surgery, University of Freiburg*

Dr. Trummer is a Cardiac Surgeon specialized in intensive care medicine, extracorporeal circulation and resuscitation. The daily routine in organ protection and extracorporeal circulation led to the research on controlled whole body reperfusion—“CARL”—after cardiac arrest using extra coporeal circulation. This research started in 2003 at UCLA and is ongoing in Freiburg/Germany with paralleled engineering of suitable medical devices in a spin-off of the University of Freiburg.

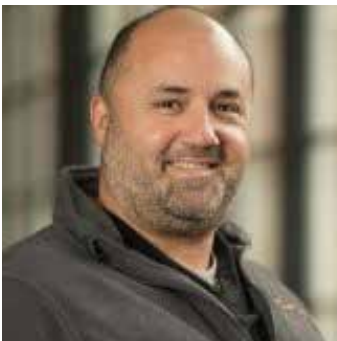

### **Demetri Yannopoulos, MD**

*Professor, Medicine; Research Director, Interventional Cardiology, Director, Resuscitation Medicine University of Minnesota*

Dr. Yannopoulos has dedicated his scientific and academic career in the field of resuscitation. He has had continuous funding from the NIH to evaluate methods to improve neurological outcomes after prolong untreated arrest for the last 10 years, and is the Principal Investigator of the NIH Funded ARREST Trial. Dr. Yannopoulos has been actively redefining the future of time-sensitive interventions in the emergency medical field, and designed the first-of-its-kind medical mobile ECMO truck used to deliver immediate medical care to cardiac arrest patients.

## **NEUROPROTECTION**

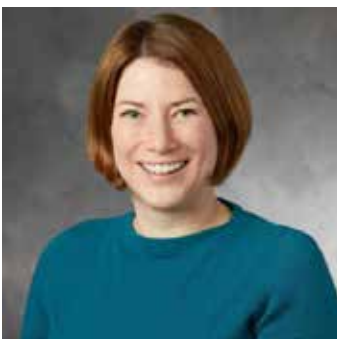

### **Karen G. Hirsch, MD**

*Associate Professor, Neurology and Neurosurgery, Stanford University and Stanford Health Care*

Dr. Hirsch’s research focuses on using continuous and discrete multi-modal data to develop phenotypes and identify signatures of treatment responsiveness in patients with coma after cardiac arrest. She is the Co-PI of PRECICECAP (PRecision Care In Cardiac ArrEst - ICECAP, NINDS R01 NS119825-01) and works closely with collaborators in data science at Stanford and with industry partners to apply machine learning analyses to the complex multi-modal ICU data. Dr. Hirsch also studies neuro-imaging in post-cardiac arrest coma and traumatic brain injury.

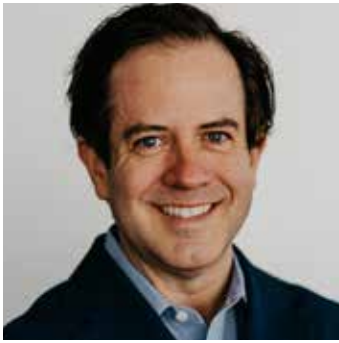

### **Todd Kilbaugh, MD**

*Assistant Professor of Anesthesia, Critical Care and Pediatrics, Perelman School of Medicine; Medical Director, ECMO Center, Children's Hospital of Philadelphia (CHOP)*

Dr. Kilbaugh is an anesthesiologist with the Department of Anesthesiology and Critical Care Medicine and medical director of the ECMO Center at Children's Hospital of Philadelphia.

Dr. Kilbaugh's areas of expertise are Pediatric Surgical and Neurosurgical Critical Care, Perioperative Surgical Site Prophylaxis, Traumatic brain injury and neuroprotection.

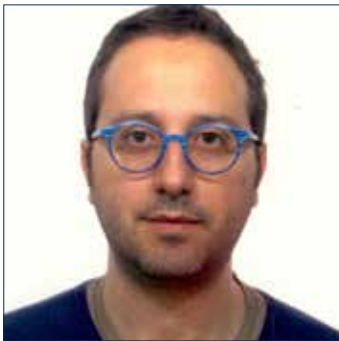

### **Giuseppe Ristagno, MD, PhD**

*Associate Professor, Department of Pathophysiology and Transplantation, University of Milan*

Dr. Ristagno is an anesthesiologist focused on preclinical and clinical studies on cardiac arrest with main focus on defibrillation and neuroprotection.

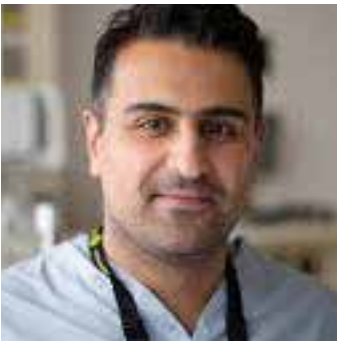

### **Mypinder Sekhon, MD, PhD**

*Clinical Associate Professor, Critical Care Medicine, Vancouver General Hospital, University of British Columbia*

Dr. Sekhon is an intensivist and clinician scientist at Vancouver General Hospital / University of British Columbia.

His interests include translational ischemia-reperfusion research in humans with post-cardiac arrest brain injury. Specifically, his research team integrates direct neuromonitoring with biomarker based analytics to ascertain insights into the disease pathophysiology in humans.

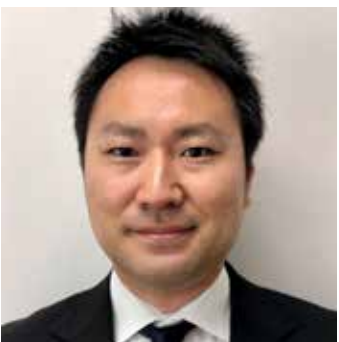

### **Tomoyoshi Tamura, MD, PhD**

*Departments of Cardiology, Emergency and Critical Care Medicine, Keio University*

Dr. Tamura works on translational studies in the fields of shock and cardiac arrest with a main focus on the clinical translation of hydrogen inhalation to mitigate post-cardiac arrest brain injury.

# Innovator Award Presenters

Recognizing six investigators who are challenging current paradigms in resuscitation science.

**Who will take home the 2023 Innovator Award?**

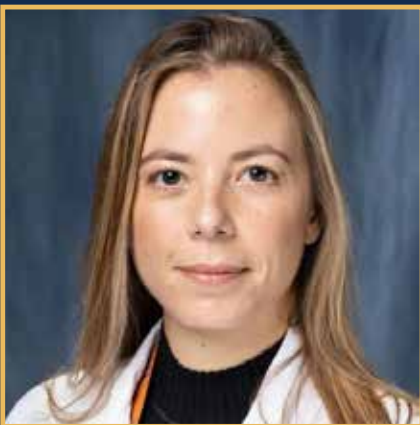

**Carolina Barbosa  
Maciel, MD, MSCR**

*University of Florida*

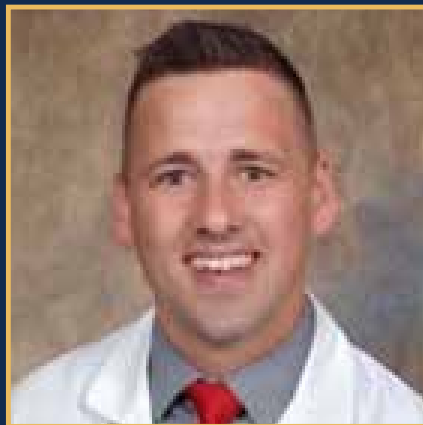

**Adam Gottula,  
MD**

*University of Michigan*

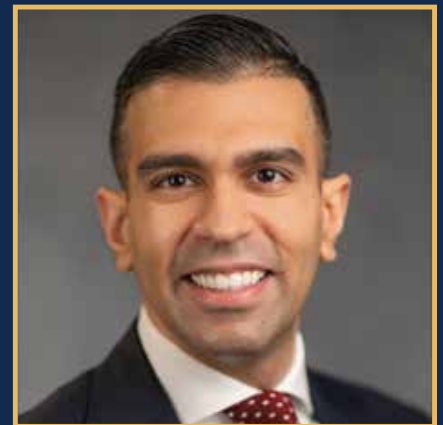

**Rajat Kalra,  
MBChB, MS**

*University of Minnesota*

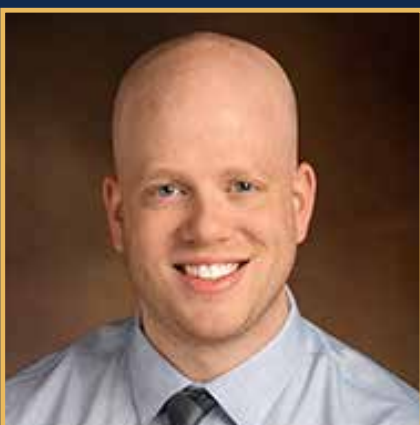

**Ryan Morgan,  
MD, MTR**

*Children's Hospital  
of Philadelphia*

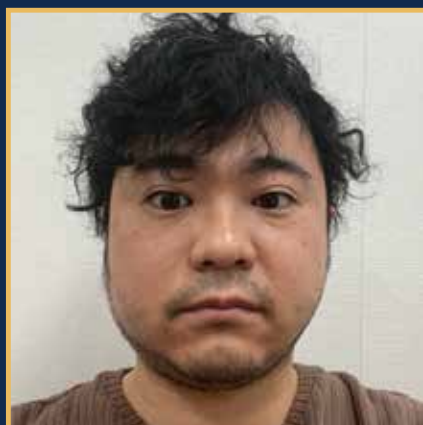

**Mitsuaki Nishikimi,  
MD**

*Hiroshima University*

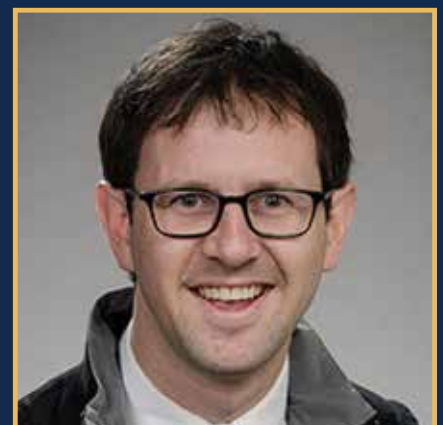

**Jacob Sunshine,  
MD, MS**

*University of Washington*

# Wolf Creek XVII Participants

Michael Adesman  
*Weil Family Foundation*

Tomoaki Aoki  
*Feinstein Institutes for Medical Research*

Fredrik Arnwald  
*Stryker*

Dianne Atkins  
*University of Iowa*

Iyad Ayoub  
*Rosalind Franklin University*

Carolina Barbosa Maciel  
*University of Florida*

Jason Bartos  
*University of Minnesota*

Linda Beasley  
*University of Michigan*

Lance Becker  
*Zucker School of Medicine at Hofstra/Northwell*

Jan Bělohávek  
*General University Hospital, Prague*

Christoph Benk  
*Resuscitec GmbH*

Robert Berg  
*Children's Hospital of Philadelphia*

Janet Bray  
*Monash University*

Christine Brent  
*University of Michigan*

Steven Brooks  
*Queen's University*

D'Arcy Carll  
*American Heart Association*

Maaret Castrén  
*Helsinki and Uusimaa Healthcare District*

Fred Chapman  
*Stryker*

Sheldon Cheskes  
*University of Toronto*

Mark Clark  
*University of Michigan*

Darryl Conway  
*University of Michigan*

Lisa Coon  
*University of Michigan*

Jason Coult  
*University of Washington*

Katie Dainty  
*North York General Hospital*

Robert Dickson  
*University of Michigan*

Jean-Philippe Didon  
*SCHILLER Medical*

Ian Drennan  
*Sunnybrook Health Science Center*

Ryann Eff  
*Michigan Medicine*

Jim Ellis  
*National Football League (NFL)*

Jonathan Elmer  
*University of Pittsburgh*

Jennifer Fowler  
*University of Michigan*

Michael Fries  
*St. Vincenz Hospital*

Christopher Gaisendrees  
*University Hospital of Cologne*

Raul Gazmuri  
*Rosalind Franklin University of Medicine & Science*



Romergrzyko Geocadin  
*Johns Hopkins University*

Paolo Giacometti  
*ZOLL Medical Corporation*

Adam Gottula  
*University of Michigan*

Jeff Gould  
*ZOLL Medical Corporation*

Sean Graham  
*Stryker*

Asger Granfeldt  
*Arhaus University Hospital*

Dakota Gustafson  
*Queen's University*

Henry Halperin  
*Johns Hopkins University*

Adam Harvey  
*Stryker*

Karen Hirsch  
*Stanford University*

Michael Holzer  
*Medical University of Vienna*

Amber Hoover  
*American Heart Association*

Cindy Hsu  
*University of Michigan*

Ahamed Idris  
*UT Southwestern*

Dawn Jorgenson  
*Philips*

Rajat Kalra  
*University of Minnesota*

Denny Kellington  
*Buffalo Bills*

Karl Kern  
*University of Arizona*

Todd Kilbaugh  
*Children's Hospital of Philadelphia*

Ruud Koster  
*Amsterdam UMC*

Thomas Kraft  
*CARL. Resuscitac*

Peter Kudenchuk  
*University of Washington*

Joshua Lampe  
*ZOLL Medical Corporation*

Deborah Leahy  
*ZOLL Medical Corporation*

Benjamin Leung  
*University of Toronto*

Chenguang Liu  
*Philips*

James Manning  
*University of North Carolina at Chapel Hill*

David Medine  
*Weil Family Foundation*

William Meurer  
*University of Michigan*

Amanda Missel  
*University of Michigan*

Johanna Moore  
*Hennepin Healthcare*

Ryan Morgan  
*Children's Hospital of Philadelphia*

Laurie Morrison  
*University of Toronto*

Naghmeh Mostofi  
*ZOLL Medical Corporation*

Kate Murphy  
*University of Michigan*

Takahiro Nakashima  
*University of Michigan*

Robert Neumar  
*University of Michigan*

Yih Yng Ng  
*Ng Teng Fong Center for Healthcare Innovation*

Mitsuaki Nishikimi  
*Hiroshima University*

Brian O'Neil  
*Wayne State University*

Theresa Mariero Olasveengen  
*Oslo University Hospital*

Kenn Oldham  
*University of Michigan*

Marcus Ong  
*Duke NUS Medical School*

Norman Paradis  
*Dartmouth College*

Sam Parnia  
*NYU Langone*

James Paxton  
*Wayne State University*

Maeve Pek  
*Duke NUS Medical School*

Gavin Perkins  
*University of Warwick*

Steffen Pooth  
*University Medical Center Freiburg*

Thomas Rea  
*University of Washington*

Giuseppe Ristagno  
*University of Milan*

Amina Salahaddin  
*CARL.Resuscitec*

Thomas Sanderson  
*University of Michigan*

Claudio Sandroni  
*Università Cattolica del Sacro Cuore*

Carly Schmidt  
*University of Michigan*

Florian Schmitzberger  
*University of Michigan*

Myp Sekhon  
*University of British Columbia*

Teri Shields  
*University of Michigan*

Christopher Shoemaker  
*University of Michigan*

Robert Silbergleit  
*University of Michigan*

Kathleen Stringer  
*University of Michigan*

Kjetil Sunde  
*Oslo University Hospital*

Jake Sunshine  
*University of Washington*

Robert Sutton  
*University of Pennsylvania*

Masaru Suzuki  
*Tokyo Dental College*

Robert Swor  
*Beaumont Health*

Tomoyoshi Tamura  
*Keio University*

Wanchun Tang  
*Weil Institute (Retired)*

Tyson Taylor  
*Stryker*

Hakam Tiba  
*University of Michigan*

Renaud Tissier  
*Ecole nationale vétérinaire d'Alfort*

Georg Trummer  
*University Hospital Freiburg*

Wisse van den Beuken  
*Amsterdam UMC*

Terry Vanden Hoek  
*UI Health*

Megan VanStratt  
*University of Michigan*

Melissa Vogelsong  
*Stanford University*

Kevin Ward  
*University of Michigan*

Wolfgang Weihs  
*Medical University of Vienna*

Carol Weil  
*Weil Family Foundation*

Susan Weil  
*Weil Family Foundation*

Myron (Mike) Weisfeldt  
*Johns Hopkins*

Wolfgang A. Wetsch  
*University Hospital of Cologne*

Joe Wider  
*University of Michigan*

Denise Wieck  
*University of Michigan*

Lars Wik  
*Oslo University Hospital*

Susan Wozniak  
*University of Michigan*

Demetris Yannopoulos  
*University of Minnesota*

Scott Youngquist  
*University of Utah*

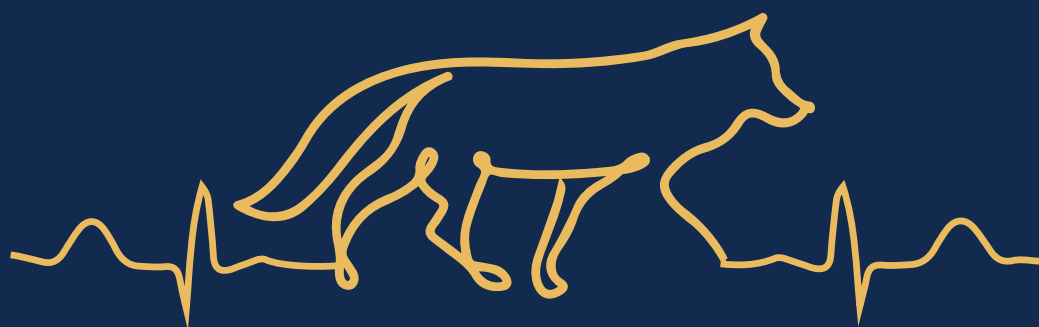

The Max Harry

**Weil Institute**

FOR CRITICAL CARE RESEARCH & INNOVATION

[www.weil institute.med.umich.edu](http://www.weil institute.med.umich.edu)
